# Supplementary material for: Mesangiogenic Progenitor Cells Are Tissue Specific and Cannot Be Isolated From Adipose Tissue or Umbilical Cord Blood
Source: PubMed Central journal article supplement (PMC8287027; doi:10.3389/fcell.2021.669381), 2021-07-05
Supplement: Table_1.pdf [file Table_1.pdf]

**Supplementary Table S1. Custom 96-well PrimePCR™ Plates, gene list**

| Well | Gene Name                                                                                             | Gene Symbol | Entrez Gene ID | Unique Assay Id | Amplicon Length (bp) |
|------|-------------------------------------------------------------------------------------------------------|-------------|----------------|-----------------|----------------------|
| A1   | actin, alpha 1, skeletal muscle                                                                       | ACTA1       | 58             | qHsaCED0045151  | 60                   |
| A2   | cadherin 5, type 2 (vascular endothelium)                                                             | CDH5        | 1003           | qHsaCID0016288  | 112                  |
| A3   | chemokine (C-X-C motif) receptor 4                                                                    | CXCR4       | 7852           | qHsaCED0002020  | 142                  |
| A4   | fibroblast growth factor receptor 2                                                                   | FGFR2       | 2263           | qHsaCID0021928  | 124                  |
| A5   | insulin-like growth factor 1 receptor                                                                 | IGF1R       | 3480           | qHsaCID0015667  | 81                   |
| A6   | integrin, alpha V (vitronectin receptor, alpha polypeptide, antigen CD51)                             | ITGAV       | 3685           | qHsaCID0006233  | 130                  |
| A7   | low density lipoprotein receptor                                                                      | LDLR        | 3949           | qHsaCID0015114  | 121                  |
| A8   | mannose receptor, C type 1                                                                            | MRC1        | 4360           | qHsaCID0037074  | 77                   |
| A9   | podoplanin                                                                                            | PDPN        | 10630          | qHsaCID0009013  | 134                  |
| A10  | sal-like 4 (Drosophila)                                                                               | SALL4       | 57167          | qHsaCID0014611  | 157                  |
| A11  | tyrosine kinase with immunoglobulin-like and EGF-like domains 1                                       | TIE1        | 7075           | qHsaCID0006540  | 75                   |
| A12  | glyceroldehyde-3-phosphate dehydrogenase                                                              | GAPDH       | 2597           | qHsaCED0038674  | 117                  |
| B1   | activated leukocyte cell adhesion molecule                                                            | ALCAM       | 214            | qHsaCID0037887  | 173                  |
| B2   | CAAT/enhancer binding protein (C/EBP), beta                                                           | CEBPB       | 1051           | qHsaCED0019041  | 117                  |
| B3   | desmin                                                                                                | DES         | 1674           | qHsaCID0011768  | 116                  |
| B4   | fms-related tyrosine kinase 4                                                                         | FLT4        | 2324           | qHsaCID0020886  | 150                  |
| B5   | insulin-like growth factor 2 receptor                                                                 | IGF2R       | 3482           | qHsaCID0018295  | 112                  |
| B6   | integrin, alpha X (complement component 3 receptor 4 subunit)                                         | ITGAX       | 3687           | qHsaCID0006223  | 104                  |
| B7   | leptin receptor                                                                                       | LEPR        | 3953           | qHsaCID0018270  | 131                  |
| B8   | v-myc myeloblastosis viral oncogene homolog (avian)                                                   | MYB         | 4602           | qHsaCED0043781  | 105                  |
| B9   | POU class 5 homeobox 1                                                                                | POU5F1      | 5460           | qHsaCED0038334  | 100                  |
| B10  | SRY (sex determining region Y)-box 15                                                                 | SOX15       | 6665           | qHsaCED0044255  | 78                   |
| B11  | tumor necrosis factor receptor superfamily, member 11a, NFkB activator                                | TNFRSF11A   | 8792           | qHsaCID0006213  | 99                   |
| B12  | hypoxanthine phosphoribosyltransferase 1                                                              | HPRT1       | 3251           | qHsaCID0016375  | 90                   |
| C1   | platelet and endothelial cell adhesion molecule 1                                                     | PECAM1      | 5175           | *               | 231                  |
| C2   | colony stimulating factor 1 receptor                                                                  | CSF1R       | 1436           | qHsaCID0010604  | 150                  |
| C3   | dickkopf homolog 1 (Xenopus laevis)                                                                   | DKK1        | 22943          | qHsaCED0002060  | 118                  |
| C4   | forkhead box F1                                                                                       | FOXF1       | 2294           | qHsaCED0002932  | 133                  |
| C5   | interleukin 4 receptor                                                                                | IL4R        | 3566           | qHsaCID0008648  | 143                  |
| C6   | integrin, beta 1 (fibronectin receptor, beta polypeptide, antigen CD29 includes MDF2, MSK12)          | ITGB1       | 3688           | qHsaCED0005248  | 104                  |
| C7   | lymphatic vessel endothelial hyaluronan receptor 1                                                    | LYVE1       | 30894          | qHsaCID0010430  | 126                  |
| C8   | v-myc myelocytomatosis viral oncogene homolog (avian)                                                 | MYC         | 4609           | qHsaCID0012921  | 103                  |
| C9   | peroxisome proliferator-activated receptor gamma                                                      | PPARG       | 5428           | qHsaCID0011718  | 117                  |
| C10  | SRY (sex determining region Y)-box 9                                                                  | SOX9        | 6662           | qHsaCED0021217  | 77                   |
| C11  | von Willebrand factor                                                                                 | VWF         | 7450           | qHsaCED0033958  | 113                  |
| C12  | ribosomal protein L13                                                                                 | RPL13       | 6137           | qHsaCED0056592  | 114                  |
| D1   | CD163 molecule                                                                                        | CD163       | 9332           | qHsaCID0012333  | 150                  |
| D2   | colony stimulating factor 2 receptor, alpha, low-affinity (granulocyte-macrophage)                    | CSF2RA      | 1438           | qHsaCID0013436  | 92                   |
| D3   | delta-like 4 (Drosophila)                                                                             | DLL4        | 54567          | qHsaCID0008450  | 84                   |
| D4   | frizzled homolog 1 (Drosophila)                                                                       | FZD1        | 8321           | qHsaCED0018783  | 116                  |
| D5   | integrin, alpha 1                                                                                     | ITGA1       | 3672           | qHsaCID0017712  | 144                  |
| D6   | integrin, beta 2 (complement component 3 receptor 3 and 4 subunit)                                    | ITGB2       | 3689           | qHsaCED0003958  | 63                   |
| D7   | v-maf musculoaponeurotic fibrosarcoma oncogene homolog B (avian)                                      | MAFB        | 9935           | qHsaCED0002199  | 115                  |
| D8   | Nanog homeobox                                                                                        | NANOG       | 79923          | qHsaCED0043394  | 158                  |
| D9   | prospero homeobox 1                                                                                   | PROX1       | 5629           | qHsaCID0018340  | 86                   |
| D10  | spleen focus forming virus (SFFV) proviral integration oncogene spi1                                  | SP1         | 6688           | qHsaCID0022097  | 96                   |
| D11  | wingless-type MMTV integration site family, member 11                                                 | WNT11       | 7481           | qHsaCID0011927  | 88                   |
| D12  | PrimePCR DNA Contamination Control Assay                                                              | gDNA        | -              | qHsaCtID0001004 | -                    |
| E1   | CD248 molecule, endosialin                                                                            | CD248       | 57124          | qHsaCED0018682  | 121                  |
| E2   | chondroitin sulfate proteoglycan                                                                      | CSPG4       | 1464           | qHsaCID0005989  | 148                  |
| E3   | epidermal growth factor receptor                                                                      | EGFR        | 1956           | qHsaCID0007564  | 97                   |
| E4   | frizzled homolog 9 (Drosophila)                                                                       | FZD9        | 8326           | qHsaCED0019089  | 69                   |
| E5   | integrin, alpha 5 (fibronectin receptor, alpha polypeptide)                                           | ITGA5       | 3678           | qHsaCID0021495  | 140                  |
| E6   | integrin, beta 5                                                                                      | ITGB5       | 3693           | qHsaCID0007523  | 76                   |
| E7   | melanoma cell adhesion molecule                                                                       | MCAM        | 4162           | qHsaCID0020233  | 146                  |
| E8   | nestin                                                                                                | NES         | 10763          | qHsaCED0001303  | 87                   |
| E9   | protein tyrosine phosphatase, receptor type, C                                                        | PTPRC       | 5788           | qHsaCED0038908  | 69                   |
| E10  | secreted phosphoprotein 1                                                                             | SPP1        | 6696           | qHsaCID0012060  | 99                   |
| E11  | wingless-type MMTV integration site family, member 3                                                  | WNT3        | 7473           | qHsaCID0015193  | 103                  |
| E12  | PrimePCR Positive Control Assay                                                                       | PCR         | -              | qHsaCtID0001003 | -                    |
| F1   | CD34 molecule                                                                                         | CD34        | 947            | qHsaCID0007456  | 99                   |
| F2   | cathepsin K                                                                                           | CTSK        | 1513           | qHsaCID0016934  | 147                  |
| F3   | endomucin                                                                                             | EMCN        | 51705          | qHsaCED0046161  | 91                   |
| F4   | GATA binding protein 6                                                                                | GATA6       | 2627           | qHsaCED0045017  | 81                   |
| F5   | integrin, alpha 6                                                                                     | ITGA6       | 3655           | qHsaCID0007188  | 130                  |
| F6   | jagged 1                                                                                              | JAG1        | 182            | qHsaCID0006831  | 99                   |
| F7   | matrix metalloproteinase 7 (matrilysin, uterine)                                                      | MMP7        | 4316           | qHsaCID0011537  | 138                  |
| F8   | 5'-nucleotidase, ecto (CD73)                                                                          | NT5E        | 4907           | qHsaCID0036556  | 117                  |
| F9   | regulator of G-protein signaling 5                                                                    | RG55        | 8490           | qHsaCED0045107  | 67                   |
| F10  | signal transducer and activator of transcription 1, 91kDa                                             | STAT1       | 6772           | qHsaCID0007580  | 92                   |
| F11  | wingless-type MMTV integration site family, member 5B                                                 | WNT5B       | 81029          | qHsaCID0038673  | 69                   |
| F12  | PrimePCR RNA Quality Assay                                                                            | RQ1         | -              | qHsaCtID0001002 | -                    |
| G1   | CD68 molecule                                                                                         | CD68        | 968            | qHsaCED0007025  | 82                   |
| G2   | chemokine (C-X3-C motif) receptor 1                                                                   | CX3CR1      | 1524           | qHsaCED0046543  | 68                   |
| G3   | F-box protein 15                                                                                      | FBXO15      | 201456         | qHsaCID0021364  | 144                  |
| G4   | hypoxia inducible factor 1, alpha subunit (basic helix-loop-helix transcription factor)               | HIF1A       | 3091           | qHsaCID0014755  | 72                   |
| G5   | integrin, alpha L (antigen CD11A (p180), lymphocyte function-associated antigen 1; alpha polypeptide) | ITGAL       | 3683           | qHsaCID0015523  | 146                  |
| G6   | jagged 2                                                                                              | JAG2        | 3714           | qHsaCED0003193  | 127                  |
| G7   | matrix metalloproteinase 8 (neutrophil collagenase)                                                   | MMP8        | 4317           | qHsaCID0023232  | 135                  |

|     |                                                                                        |        |      |                 |     |
|-----|----------------------------------------------------------------------------------------|--------|------|-----------------|-----|
| G8  | platelet-derived growth factor receptor, alpha polypeptide                             | PDGFRA | 5156 | qHsaCID0007202  | 103 |
| G9  | runt-related transcription factor 1                                                    | RUNX1  | 861  | qHsaCID0037818  | 74  |
| G10 | signal transducer and activator of transcription 6, interleukin-4 induced              | STAT6  | 6778 | qHsaCED0056844  | 120 |
| G11 | actin, beta                                                                            | ACTB   | 60   | qHsaCED0036269  | 62  |
| G12 | PrimePCR RNA Quality Assay                                                             | RQ2    | --   | qHsaCtID0001002 | --  |
| H1  | CD86 molecule                                                                          | CD86   | 942  | qHsaCID0021122  | 97  |
| H2  | chemokine (C-X-C motif) ligand 12                                                      | CXCL12 | 6387 | qHsaCID0012398  | 94  |
| H3  | Fc fragment of IgG, high affinity Ia, receptor (CD64)                                  | FCGR1A | 2209 | qHsaCED0034082  | 144 |
| H4  | interferon gamma receptor 1                                                            | IFNGR1 | 3459 | qHsaCID0013339  | 84  |
| H5  | integrin, alpha M (complement component 3 receptor 3 subunit)                          | ITGAM  | 3684 | qHsaCID0006023  | 146 |
| H6  | kinase insert domain receptor (a type III receptor tyrosine kinase)                    | KDR    | 3791 | qHsaCID0006310  | 140 |
| H7  | matrix metalloproteinase 9 (gelatinase B, 92kDa gelatinase, 92kDa type IV collagenase) | MMP9   | 4318 | qHsaCID0011597  | 82  |
| H8  | platelet-derived growth factor receptor, beta polypeptide                              | PDGFRB | 5159 | qHsaCID0013272  | 117 |
| H9  | runt-related transcription factor 2                                                    | RUNX2  | 860  | qHsaCED0044067  | 83  |
| H10 | TEK tyrosine kinase, endothelial                                                       | TEK    | 7010 | qHsaCID0015119  | 101 |
| H11 | beta-2-microglobulin                                                                   | B2M    | 567  | qHsaCID0015347  | 123 |
| H12 | PrimePCR Reverse Transcription Control Assay                                           | RT     | --   | qHsaCtID0001001 | --  |

(\*) Custom designed primer pair Forward Primer: GAACCTGCTCCTCCATC  
Reverse Primer: TCAAAGTGGGCATCATAAGAAAT
