# Supplementary material for: Mesangiogenic Progenitor Cells Are Tissue Specific and Cannot Be Isolated From Adipose Tissue or Umbilical Cord Blood
Source: PubMed Central journal article supplement (PMC8287027; doi:10.3389/fcell.2021.669381), 2021-07-05
Supplement: Table_2.pdf [file Table_2.pdf]

Supplementary Table S2. Flow Cytometry quantification of Pop#8

| SampleID    | BM-MNCs     |                | SampleID    | UCB-MNCs    |                | SampleID    | SVF         |                |
|-------------|-------------|----------------|-------------|-------------|----------------|-------------|-------------|----------------|
|             | Pop#8%      | Culture Yield% |             | Pop#8%      | Culture Yield% |             | Pop#8%      | Culture Yield% |
| BM001       | 1,71        | 2,56           | UCB01       | 0,01        | 0,50           | SVF01       | 0,03        | 4,80           |
| BM002       | 1,85        | 2,22           | UCB02       | 0,02        | 1,61           | SVF02       | 0,08        | 4,00           |
| BM003       | 2,84        | 0,58           | UCB03       | 0,02        | 1,00           | SVF03       | 0,03        | 2,25           |
| BM004       | 2,50        | 0,20           | UCB04       | 0,02        | 0,09           | SVF04       | 0,09        | 2,50           |
| BM005       | 1,24        | 0,13           | UCB05       | 0,10        | 0,65           | SVF05       | 0,03        | 3,10           |
| BM006       | 0,80        | 0,73           | UCB06       | 0,09        | 1,37           | SVF06       | 0,00        | 2,10           |
| BM007       | 1,18        | 1,37           | UCB07       | 0,04        | 1,72           | SVF07       | 0,03        | 2,40           |
| BM008       | 1,50        | 0,78           | UCB08       | 0,07        | 0,08           |             |             |                |
| BM009       | 1,78        | 2,11           | UCB09       | 0,10        | 0,86           |             |             |                |
| BM010       | 1,70        | 1,51           | UCB10       | 0,05        | 0,00           |             |             |                |
| BM011       | 1,73        | 0,83           | UCB11       | 0,09        | 0,33           |             |             |                |
| BM012       | 0,75        | 0,61           | UCB12       | 0,10        | 0,04           |             |             |                |
| BM013       | 1,83        | 1,38           | UCB13       | 0,09        | 0,30           |             |             |                |
| BM014       | 0,65        | 0,34           | UCB14       | 0,06        | 0,83           |             |             |                |
| BM015       | 1,28        | 0,13           | UCB15       | 0,01        | 0,17           |             |             |                |
| BM016       | 1,42        | 0,98           | UCB16       | 0,07        | 0,06           |             |             |                |
| BM017       | 1,94        | 0,50           | UCB17       | 0,01        | 0,12           |             |             |                |
| BM018       | 1,51        | 0,54           | UCB18       | 0,07        | 0,41           |             |             |                |
| BM019       | 1,73        | 0,63           | UCB19       | 0,02        | 1,00           |             |             |                |
| BM020       | 1,45        | 0,94           | UCB20       | 0,00        | 0,35           |             |             |                |
| BM021       | 1,55        | 1,36           | UCB21       | 0,03        | 0,15           |             |             |                |
| BM022       | 1,10        | 0,79           | UCB22       | 0,01        | 1,80           |             |             |                |
| BM023       | 2,20        | 1,33           | UCB23       | 0,01        | 1,13           |             |             |                |
| BM024       | 1,76        | 1,01           | UCB24       | 0,02        | 0,60           |             |             |                |
| BM025       | 1,20        | 0,78           | UCB25       | 0,01        | 0,42           |             |             |                |
| BM026       | 2,10        | 1,12           | UCB26       | 0,03        | 0,87           |             |             |                |
| BM027       | 1,70        | 0,94           |             |             |                |             |             |                |
| BM028       | 1,87        | 0,87           |             |             |                |             |             |                |
| BM029       | 1,82        | 1,21           |             |             |                |             |             |                |
| BM030       | 1,87        | 1,10           |             |             |                |             |             |                |
| BM031       | 0,61        | 0,55           |             |             |                |             |             |                |
| BM032       | 1,91        | 0,78           |             |             |                |             |             |                |
| <i>Mean</i> | <b>1,60</b> | <b>0,97</b>    | <i>Mean</i> | <b>0,04</b> | <b>0,63</b>    | <i>Mean</i> | <b>0,04</b> | <b>3,02</b>    |
| <i>SEM</i>  | 0,12        | 0,12           | <i>SEM</i>  | 0,04        | 0,13           | <i>SEM</i>  | 0,40        | 0,38           |
